# Supplementary material
Source: PubMed Central journal article supplement (PMC2231642)

## Supplementary Data

### Supplemental Figures

Fig. S1. Up-regulation of Notch pathway components in *spen* clones. Confocal micrograph of *spen* eye discs clones stained (in red) for (A,B) Scabrous, (C,D) extracellular Notch (Notch<sup>EC</sup>, 1:200 C458.2H, DSHB) and (E,F) E(spl)-bHLH (mAb323). *spen* mutant tissue lacks GFP (green). Sca expression is broadened in *spen* clones (A,B, brackets) as compared to its restricted expression in IG cells. Notch expression is elevated in clones (C,D, arrows). E(spl)-bHLH expression is broadened in *spen* clones (E,F, brackets) and elevated posterior to the MF. E(spl)-bHLH is normally restricted to alternating groups of cells (E, arrowheads). Discs are oriented anterior to the left. Scale bars = 20  $\mu$ m.

Fig. S2. *E(spl)-bHLH* transcripts are elevated in *spen* mutant discs. qRT-PCR was performed to measure relative (A) *E(spl)-m3* and (B) *E(spl)-m $\beta$*  mRNA levels in wild-type and *spen/cell* lethal eye discs (three samples, mean + st. dev.). Elevated levels are significant (\*),  $p = 0.0026$  and  $0.018$ , respectively.

Fig. S3. *spen* loss affects EGFR signaling pathway components. (A,B) Confocal micrographs of third instar eye imaginal discs oriented with anterior to the left in *spen* clones stained (in red) for (A,B) dpERK or (C,D) Yan. *spen* mutant tissue lacks GFP (green). dpERK is lost at the MF in *spen* clones (A,B, asterisks \*) but appears unchanged posterior to the MF. Yan is up-regulated in *spen* clones both in and posterior to the MF (B,D, arrows). Scale bars = 20  $\mu$ m.

Fig. S4. Yan is up-regulated in *spen* wing clones that express ectopic Yan from a cDNA transgene. (A,B) confocal micrographs of third instar wing imaginal discs that co-expression NLS-tagged GFP with (A,B) Yan<sup>WT</sup> or (B) Yan<sup>ACT</sup> under the control of the *dpp*-GAL4 driver. *dpp*>Yan<sup>WT</sup> (A,B, arrows) is expressed in a subset of cells where *dpp*>GFP<sup>NLS</sup> is driven (A,B, arrowheads). However, *dpp*>Yan<sup>ACT</sup> co-localizes well (C,D, arrows) with *dpp*>GFP<sup>NLS</sup>. (E,F) *dpp*>Yan<sup>WT</sup> is expressed in a *spen* clones background. *spen* clones lack GFP (green). More red Yan-positive cells are seen in *spen* mutant tissue (E,F, arrowheads) than in control tissue (E,F, arrow). Discs are oriented dorsal up. Scale bars = 20  $\mu$ m.

Fig. S5. Loss of organization and cell types in *spen* mutant pupal tissue. Confocal micrographs of eye imaginal discs 42 hr APF (after puparium formation) in wild-type (A,C,E) and *spen* clones (B,D,F). Discs were stained for (A,B) DE-cadherin (DE-cad, 1:50 DCAD2, DSHB), (C,D) Elav, and (E,F) Cut. *spen* mutant tissue is marked by lack of GFP (green). C,E and D,F correspond to the same sample, respectively. DE-cad (A,B) is a cell boundary marker that especially marks cone, pigment, and bristle cells. *spen* mutant tissue (B) shows loss of these cell types and loss of the regular ommatidial organization found in wild-type (A). In *spen* clones, there are fewer Elav-positive R cells (D) and Cut-positive cone cells (F). Scale bars = 10  $\mu$ m.

# Fig. S1

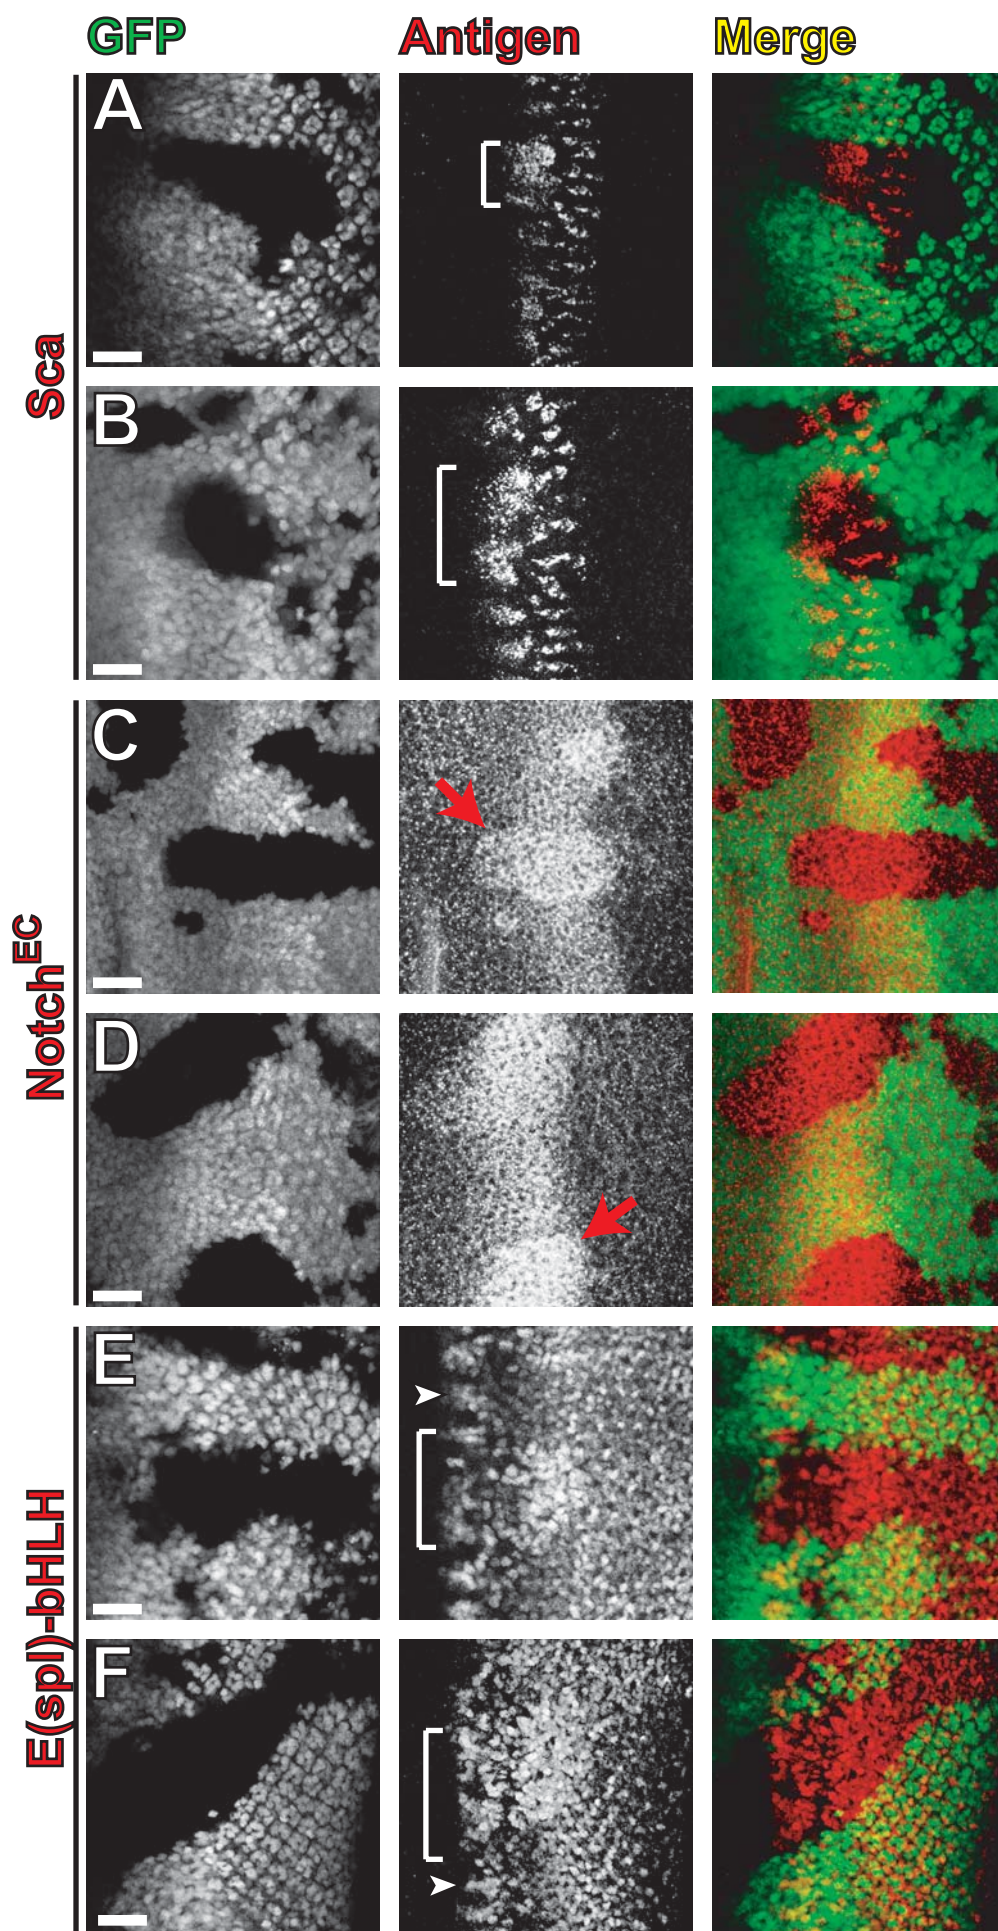

# Fig. S2

## A

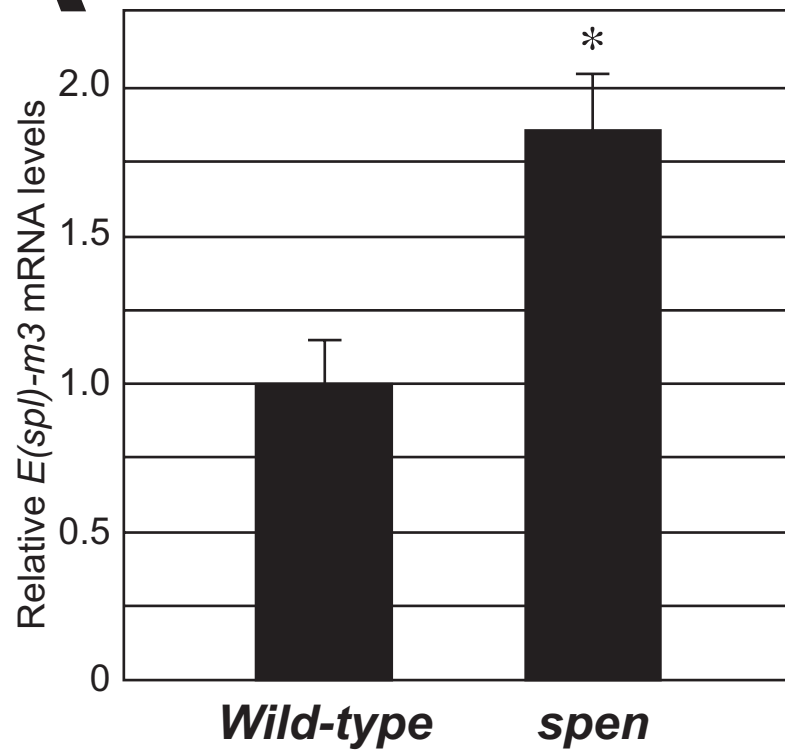

## B

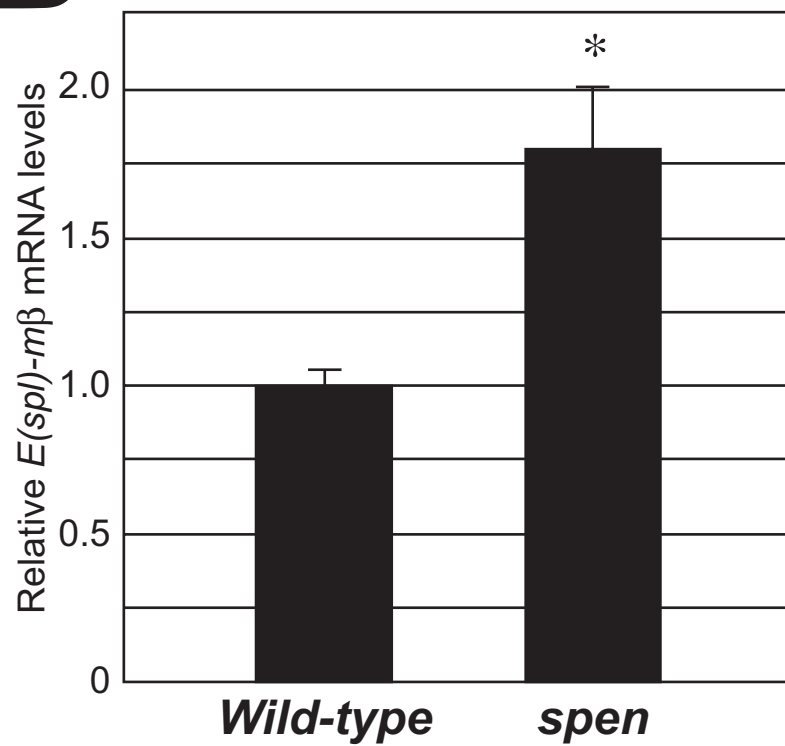



# Fig. S3

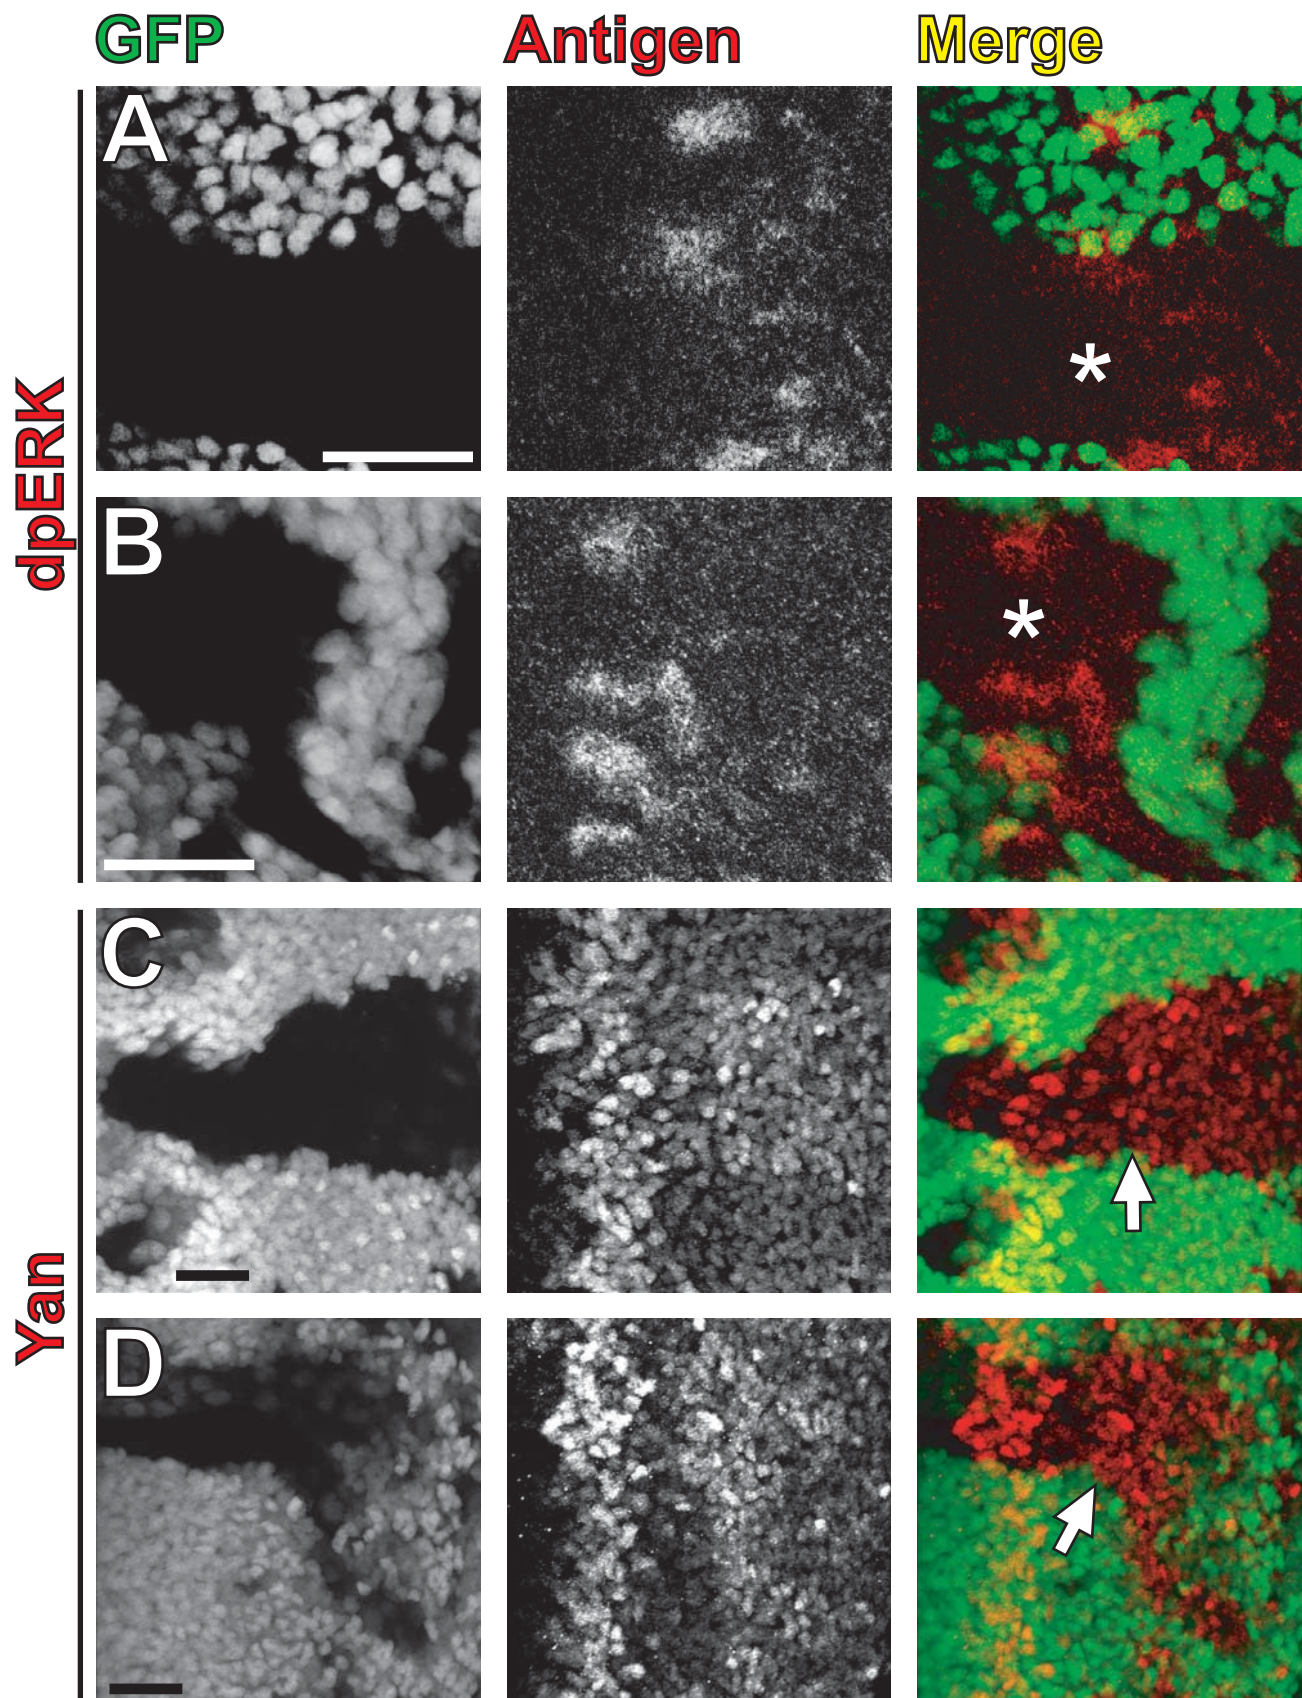

# Fig. S4

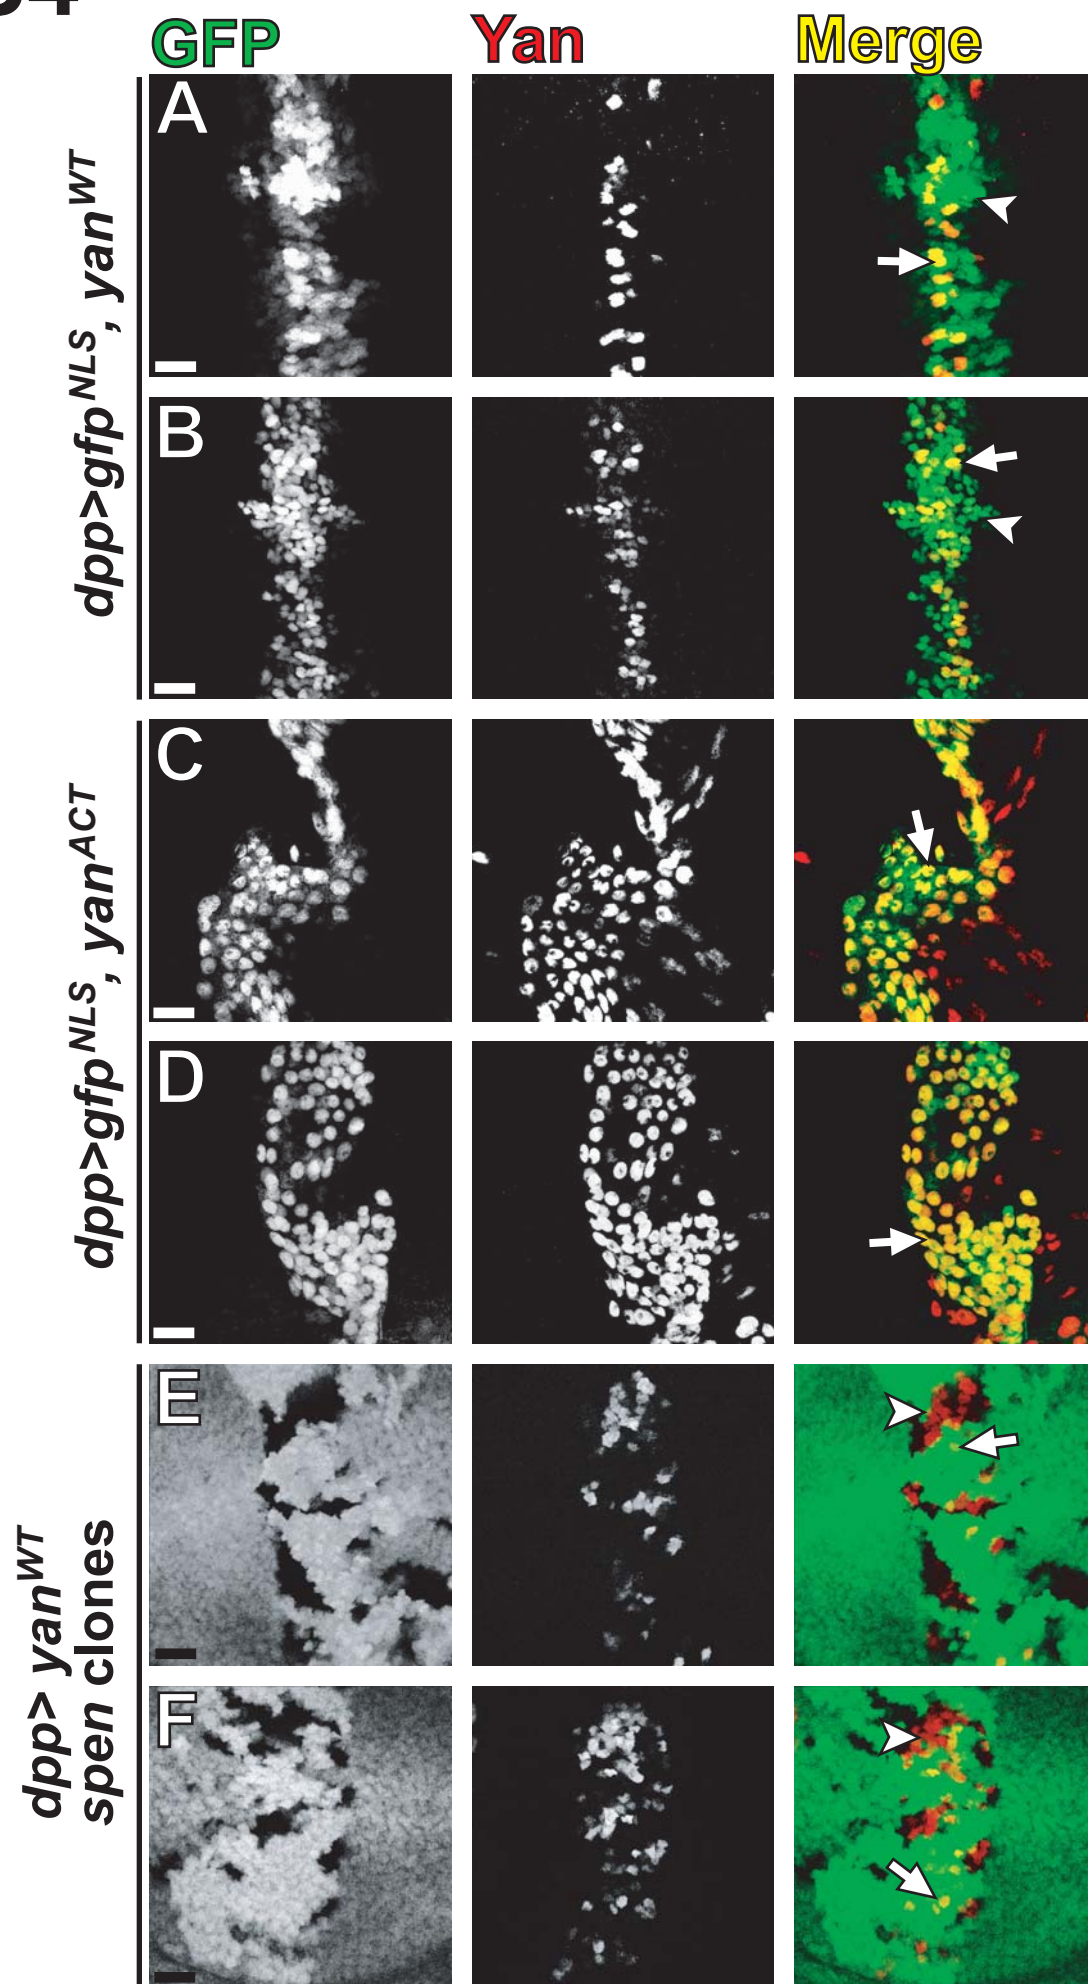



# Fig. S5

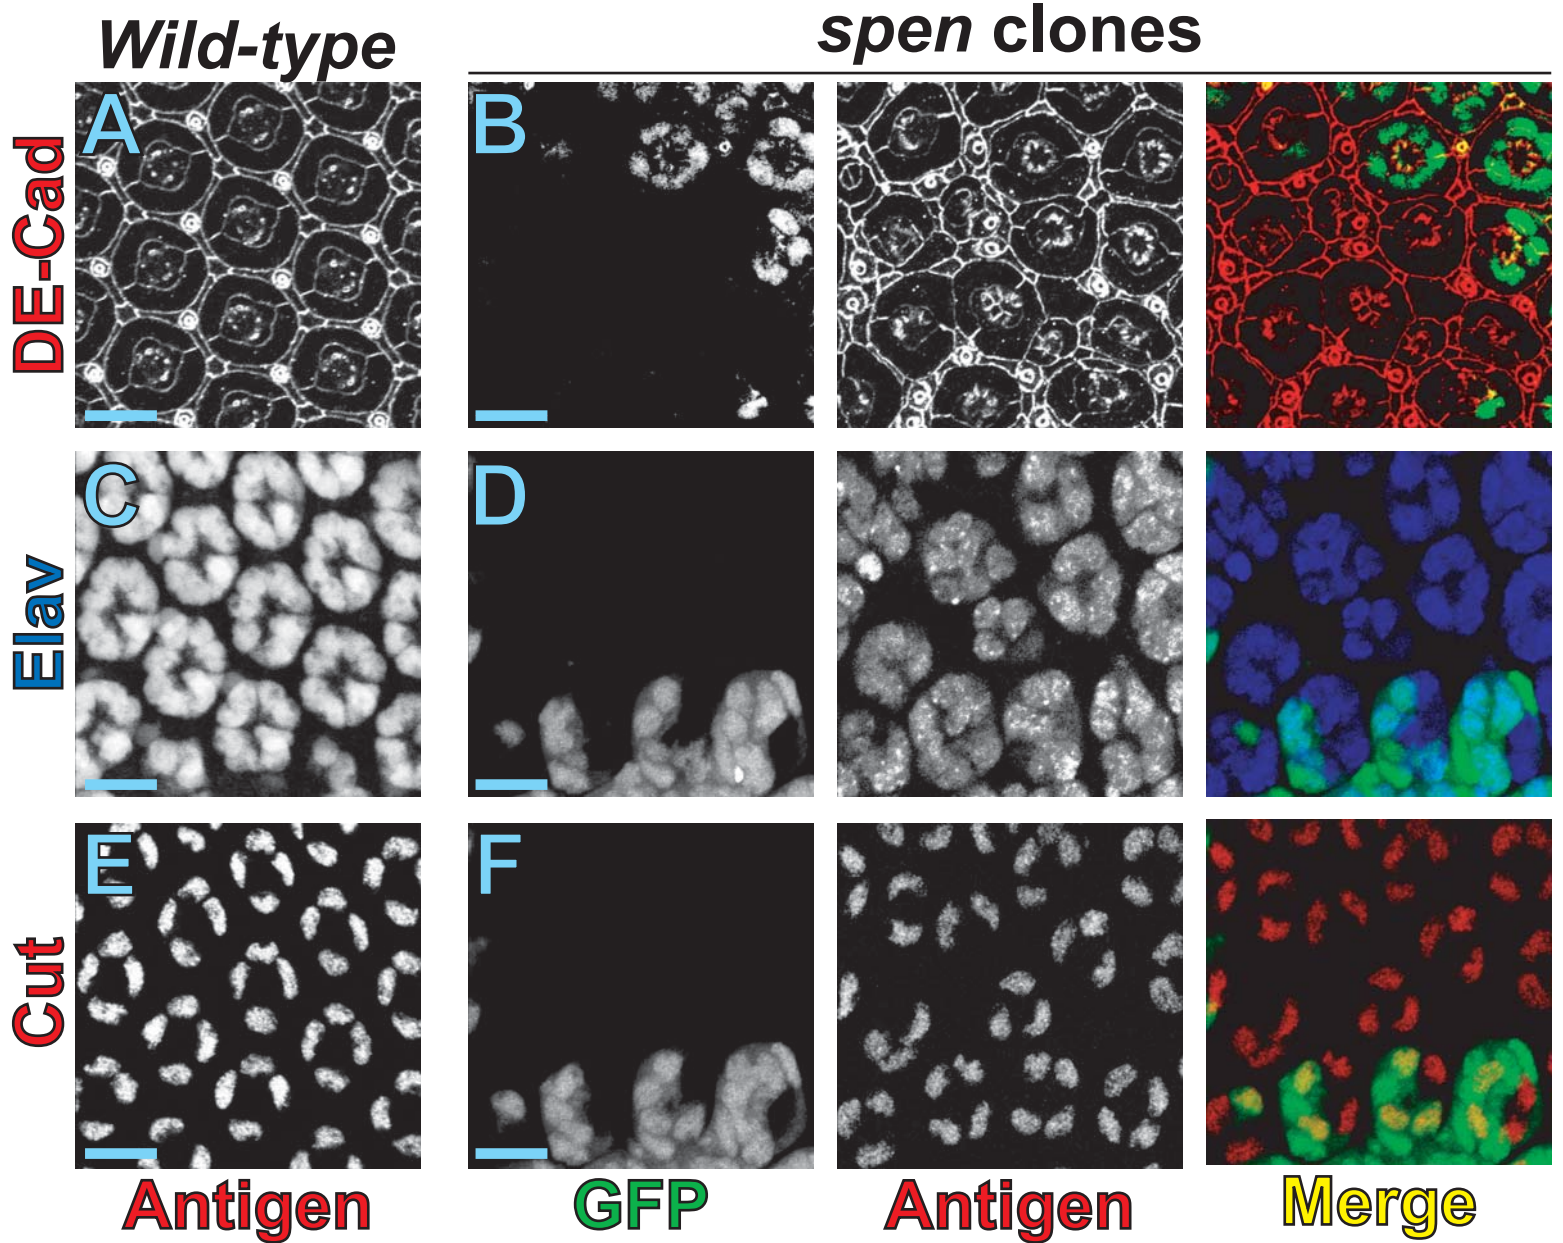

Supplement: NIHMS31869-supplement.pdf [file NIHMS31869-supplement.pdf]
